# Supplementary material
Source: HighWire-hosted journal article supplement (http://qshc.bmj.com/highwire/filestream/147081/field_highwire_adjunct_files/2/162116appendix3.pdf)
Supplement: 162116appendix3.pdf [file 162116appendix3.pdf]

### Appendix 3: Articles not Included in Data Extraction and Reason for Exclusion

| Article                                                                 | Reason Excluded                                |
|-------------------------------------------------------------------------|------------------------------------------------|
| Akici et al, Eur J Clin Pharmacol 60:211-216, 2004                      | Does not address any of the questions          |
| Antonow et al, J Nurs Care Qual 15:42-48, 2000                          | Other: no denominator for errors               |
| Balkrishnan et al, Pharmacoepidemiol Drug Saf 13:133-138, 2004          | Does not include medication errors             |
| Ballesteros et al, Vet Hum Toxicol 45:93-94, 2003                       | Pediatric data not separate                    |
| Belkacem et al, Presse Med 30:785-789, 2001                             | Article not in English                         |
| Billman, J Nurs Adm 34 Suppl:7-8, 2004.                                 | No original data                               |
| Bond et al, Pharmacotherapy 21:1023-1036, 2001                          | Does not include children or infants           |
| Buajordet et al, Acta Paediatr 91:88-94, 2002                           | Other: medication errors not separate          |
| Budnitz et al, Ann Emerg Med 45:197-206, 2005                           | Does not address any of the questions          |
| Carroll et al, Pediatrics 111:976-980, 2003                             | Does not include medication errors             |
| Chappell and Newman, Arch Dis Child Fetal Neonatal Ed 89:F483-484, 2004 | Does not include medication errors             |
| Conroy and McIntyre, Semin Fetal Neonatal Med 10:115-22, 2005           | No original data                               |
| Cote et al, Pediatrics 106:633-644, 2000                                | Other: Same data set as other article included |
| Deshpande, Arch Dis Child 88:A:20, 2003                                 | Meeting abstract only                          |
| Ducat et al, Anaesth Intensive Care 28:692-697, 2000                    | No original data                               |
| Easton-Carter et al, J Paediatr Child Health 39:124-129, 2003           | Does not address any of the questions          |
| Fortescue et al, Pediatrics 111:722-729, 2003                           | Other: Same data set as other article included |
| Gupta et al, Am J Manag Care 9:548-552, 2003                            | Does not address any of the questions          |
| Hennessy et al, JAMA 290:1494-1499, 2003                                | Does not include children or infants           |
| Horn et al, Artif Intell Med 24:217-228, 2002                           | Addresses strategies to reduce errors only     |
| Chiropractic Journal 15:36-37, 2001                                     | No original data                               |
| Pediatr Rev 25:29-40, 2004                                              | Case report only                               |
| Kaushal et al, Arch Pediatr Adolesc Med 155:1002-1007, 2001             | No original data                               |
| Kelly, Am. J. Health-Syst Pharm 58:1317-1324, 2001                      | Pediatric data not separate                    |
| Kelly, Am. J. Health-Syst Pharm 58:1325-1329, 2001                      | Pediatric data not separate                    |
| Kluger and Bullock, Anaesthesia 57:1060-1066, 2002                      | Pediatric data not separate                    |
| Koren, J Clin Pharmacol 42:707-710, 2002                                | Other: no denominator for errors               |

### Appendix 3: Articles not Included in Data Extraction and Reason for Exclusion

|                                                                  |                                                             |
|------------------------------------------------------------------|-------------------------------------------------------------|
| Kozer et al, N Engl J Med 346:1175-1176, 2002                    | Other: not peer reviewed                                    |
| Landis, Am J Health Syst Pharm 58:944-946, 2001                  | No original data                                            |
| Lazarus et al, J Trauma 54:337-343, 2003                         | Does not include children or infants                        |
| Lehmann et al, Proc AMIA Symp 435-439, 2002                      | Other: Same data set as other article included              |
| Lillis, Health Manag Technol 24:36-37, 2003                      | Other: not peer reviewed                                    |
| Luten, Surg Clin North Am 82:303-314, 2002                       | Does not include human data                                 |
| Madlon-Kay and Mosch, J Fam Pract 49:741-744, 2000               | Does not include medication errors                          |
| Magoon, American Journal of Nursing 102:24A, 2002                | No original data                                            |
| McCarthy et al, J Sch Health 70:371-376, 2000                    | Does not address any of the questions                       |
| McGrath and Klein-Schwartz, Ann Pharmacother 36:1698-1703, 2002  | Does not include medication errors                          |
| Menke et al, BMC Med Inform Decis Mak 1:3, 2001                  | Does not include medication errors                          |
| Mullett et al, Pediatrics 108:E75, 2001                          | Addresses strategies to reduce errors only                  |
| Munoz-Labian et al, An Esp Pediatr 55:535-540, 2001              | Article not in English                                      |
| Phillips et al, Am J Health Syst Pharm 58:1835-1841, 2001        | Pediatric data not separate                                 |
| Rex et al, Jt Comm J Qual Improv 26:563-575, 2000                | No original data                                            |
| Rollins, Rep Med Guidel Outcomes Res 15:10, 12, 2004             | No original data                                            |
| Ross et al, Arch Dis Child 83:492-497, 2000                      | Other: could not abstract "pre" intervention data           |
| Seifert and Jacobitz, J Toxicol Clin Toxicol 40:919-923, 2002    | Does not include children or infants                        |
| Selbst et al, Pediatr Emerg Care 15:1-4, 1999                    | Published prior to 2000                                     |
| Singh et al, Arch Intern Med 163:2027-2030, 2003                 | Pediatric data not separate                                 |
| Stratton et al, J Pediatr Nurs 19:385-392, 2004                  | Does not address any of the questions                       |
| Van den Anker, Semin Fetal Neonatal Med 10:73-81, 2005           | No original data                                            |
| Varricchio, Vaccine 20:3049-3051, 2002                           | Pediatric data not separate                                 |
| Watanachai and Suprasongsin, J Med Assoc Thai 86:1128-1132, 2003 | Other: address errors in equipment and no "rates" of errors |
| Woods et al, Pediatrics 115:155-160, 2005                        | Does not include medication errors                          |
